# Supplementary material for: Decreased Expression of BNC1 and BNC2 Is Associated with Genetic or Epigenetic Regulation in Hepatocellular Carcinoma
Source: MDPI journal article supplement (doi:10.3390/ijms17020153), 2016-01-25
Supplement: s1 [file s1]

## Supplementary Materials: Decreased Expression of *BNC1* and *BNC2* Is Associated with the Genetic or Epigenetic Regulation in Hepatocellular Carcinoma

Yali Wu, Xiaolei Zhang, Yongzhen Liu, Fengmin Lu and Xiangmei Chen

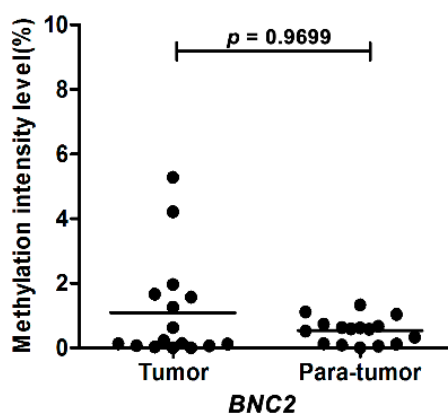

**Figure S1.** The methylation intensity of *BNC2* in 16 paired primary HCC tissues and their corresponding adjacent non-tumor liver tissues.

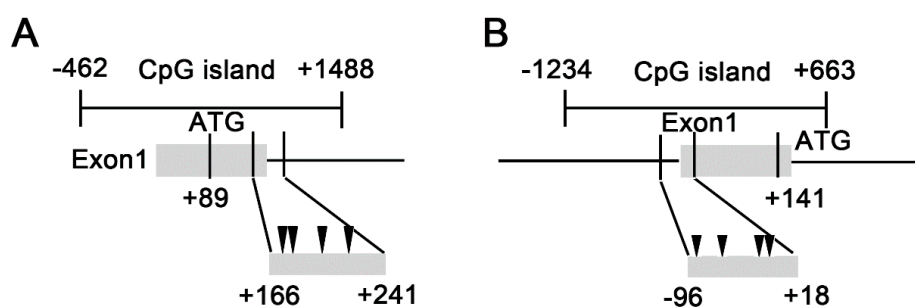

**Figure S2.** Schematic representation of the detected CGI loci of the (A) *BNC1* and (B) *BNC2* genes. The transcriptional start site for gene is defined as +1. Shaded boxes are exons of *BNC1* and *BNC2*. “▼” represents the restriction enzyme cutting site.
